# Supplementary material for: The Effectiveness of Health-Oriented Interventions and Health Promotion for Unemployed People—A Meta-Analysis
Source: Int J Environ Res Public Health. 2023 Jun 1;20(11):6028. doi: 10.3390/ijerph20116028 (PMC10252930; doi:10.3390/ijerph20116028)
Supplement: Supplementary file 1 [file ijerph-20-06028-s001.zip › ijerph-2165440-supplementary.pdf]

# The Effectiveness of Health-Oriented Interventions and Health Promotion for Unemployed People – a Meta-Analysis

Karsten Ingmar Paul and Alfons Holleederer

## *SUPPLEMENTARY ONLINE MATERIAL - A: Search strings*

### Search strings

For the PubMed database:

(unemploy\* [TIAB] OR jobseeker [TIAB] OR "job loss"[TIAB] OR reemploy\*[TIAB]) AND (program [TIAB] OR intervention[TIAB] OR "health promotion"[TIAB] OR "primary prevention"[TIAB] OR counsel\*[TIAB] OR training[TIAB] OR "physical activity"[TIAB] OR "smoking prevention"[TIAB] OR "tobacco cessation"[TIAB] OR exercise[TIAB] OR diet[TIAB] OR "stress management"[TIAB] OR "health literacy"[TIAB] OR "body weight change"[TIAB] OR "suicide prevention"[TIAB] OR "behavior coping"[TIAB]) AND (health [TIAB] OR distress[TIAB] OR depression[TIAB] OR well-being[TIAB] OR anxiety[TIAB] OR psychosomatic[TIAB] OR somatization[TIAB] OR self-esteem[TIAB] OR "sense of coherence"[TIAB] OR "physical symptoms"[TIAB] OR alcohol[TIAB] OR smoking [TIAB] OR sport [TIAB] OR "physical activity" [TIAB])

For the PsycInfo database:

(AB (unemploy\* OR jobseeker OR "job loss" OR reemploy\*) OR TI (unemploy\* OR jobseeker OR "job loss" OR reemploy\*)) AND (AB (program OR intervention OR "health promotion" OR "primary prevention" OR counsel\* OR training OR "physical activity" OR "smoking prevention" OR "tobacco cessation" OR exercise OR diet OR "stress management" OR "health literacy" OR "body weight change" OR "suicide prevention" OR "behavior coping") OR TI (program OR intervention OR "health promotion" OR "primary prevention" OR counsel\* OR training OR "physical activity" OR "smoking prevention" OR "tobacco cessation" OR exercise OR diet OR "stress management" OR "health literacy" OR "body weight change" OR "suicide prevention" OR "behavior coping")) AND (AB (health OR distress OR depression OR well-being OR anxiety OR psychosomatic OR somatization OR self-esteem OR "sense of coherence" OR "physical symptoms" OR alcohol OR smoking OR sport OR "physical activity") OR TI (health OR distress OR depression OR well-being OR anxiety OR psychosomatic OR somatization OR self-esteem OR "sense of coherence" OR "physical symptoms" OR alcohol OR smoking OR sport OR "physical activity"))

For the Scopus database:

(unemploy\* OR jobseeker OR {job loss} OR reemploy\*) AND (program OR intervention OR {health promotion} OR {primary prevention} OR counsel\* OR training OR {physical activity} OR {smoking prevention} OR {tobacco cessation} OR exercise OR diet OR {stress management} OR {health literacy} OR {body weight change} OR {suicide prevention} OR {behavior coping}) AND (health OR distress OR depression OR well-being OR anxiety OR psychosomatic OR somatization OR self-esteem OR {sense of coherence} OR {physical symptoms} OR alcohol OR smoking OR sport OR {physical activity})

*SUPPLEMENTARY ONLINE MATERIAL - B: Tables documenting the results of moderator tests**Table S1: Moderator tests for intervention effectivity on mental health: Type of intervention*

| Variable                        | Time              |     | $Q_b$ | $p$   | $k$ | $d$   | $p$    | 95% CI        |
|---------------------------------|-------------------|-----|-------|-------|-----|-------|--------|---------------|
| CBT                             | Post-intervention | Yes | 0.64  | 0.426 | 14  | 0.29  | 0.019  | [0.05, 0.53]  |
|                                 |                   | No  |       |       | 18  | 0.17  | 0.063  | [-0.01, 0.34] |
|                                 | Follow-up         | Yes | 1.08  | 0.298 | 7   | 0.18  | 0.007  | [0.05, 0.30]  |
|                                 |                   | No  |       |       | 9   | 0.10  | <0.001 | [0.05, 0.16]  |
| Non-CBT<br>Stress<br>Management | Post-intervention | Yes | 0.00  | 0.959 | 12  | 0.21  | 0.052  | [-0.00, 0.42] |
|                                 |                   | No  |       |       | 20  | 0.22  | 0.024  | [0.03, 0.40]  |
|                                 | Follow-Up         | Yes | 0.31  | 0.577 | 6   | 0.11  | <0.001 | [0.05, 0.16]  |
|                                 |                   | No  |       |       | 10  | 0.14  | 0.010  | [0.03, 0.25]  |
| Relaxation<br>techniques        | Post-intervention | Yes | 0.54  | 0.463 | 10  | 0.15  | 0.046  | [0.00, 0.30]  |
|                                 |                   | No  |       |       | 22  | 0.24  | 0.011  | [0.06, 0.43]  |
|                                 | Follow-Up         | Yes | 0.20  | 0.658 | 4   | 0.15  | 0.087  | [-0.02, 0.32] |
|                                 |                   | No  |       |       | 12  | 0.11  | <0.001 | [0.06, 0.16]  |
| Strengthening<br>social support | Post-intervention | Yes | 0.00  | 0.954 | 9   | 0.21  | 0.044  | [0.01, 0.41]  |
|                                 |                   | No  |       |       | 23  | 0.22  | 0.021  | [0.03, 0.40]  |
|                                 | Follow-up         | Yes | 0.24  | 0.624 | 6   | 0.11  | <0.001 | [0.06, 0.16]  |
|                                 |                   | No  |       |       | 10  | 0.14  | 0.027  | [0.02, 0.27]  |
| Job-search<br>training          | Post-intervention | Yes | 0.92  | 0.761 | 15  | 0.24  | 0.015  | [0.05, 0.43]  |
|                                 |                   | No  |       |       | 17  | 0.19  | 0.074  | [-0.02, 0.41] |
|                                 | Follow-up         | Yes | 0.42  | 0.515 | 9   | 0.11  | <0.001 | [0.06, 0.16]  |
|                                 |                   | No  |       |       | 7   | 0.19  | 0.035  | [0.01, 0.36]  |
| Physical<br>exercise            | Post-intervention | Yes | 0.58  | 0.448 | 4   | 0.12  | 0.317  | [-0.11, 0.35] |
|                                 |                   | No  |       |       | 28  | 0.23  | 0.005  | [0.07, 0.38]  |
| Health<br>counseling            | Post-intervention | Yes | 1.80  | 0.180 | 4   | -0.05 | 0.806  | [-0.49, 0.38] |
|                                 |                   | No  |       |       | 28  | 0.26  | <0.001 | [0.12, 0.40]  |

*Note.*  $k$  = number of effect sizes;  $d$  = average meta-analytic effect size; CI= 95% confidence interval for  $d$ ;  $Q_b$  = heterogeneity between groups;  $p$  = significance level for  $d$  or for  $Q_b$ ; CBT = cognitive behavioral training.

*Table S2: Moderator tests for intervention effectivity on physical health: Type of intervention*

| Variable                  | Time              |     | $Q_b$ | $P$   | $k$ | $d$   | $p$   | 95% CI        |
|---------------------------|-------------------|-----|-------|-------|-----|-------|-------|---------------|
| CBT                       | Post-intervention | Yes | 1.05  | 0.306 | 5   | 0.15  | 0.007 | [0.04, 0.27]  |
|                           |                   | No  |       |       | 11  | 0.05  | 0.550 | [-0.11, 0.21] |
| Non-CBT stress management | Post-intervention | Yes | 1.96  | 0.161 | 4   | -0.05 | 0.647 | [-0.25, 0.15] |
|                           |                   | No  |       |       | 12  | 0.12  | 0.053 | [-0.00, 0.24] |
| Relaxation techniques     | Post-intervention | Yes | 1.62  | 0.203 | 4   | 0.19  | 0.010 | [0.04, 0.33]  |
|                           |                   | No  |       |       | 12  | 0.06  | 0.417 | [-0.08, 0.20] |
| Job-search training       | Post-intervention | Yes | 8.59  | 0.003 | 4   | -0.11 | 0.169 | [-0.26, 0.05] |
|                           |                   | No  |       |       | 12  | 0.17  | 0.001 | [0.07, 0.27]  |
| Physical exercise         | Post-intervention | Yes | 2.11  | 0.146 | 4   | 0.20  | 0.008 | [0.05, 0.35]  |
|                           |                   | No  |       |       | 12  | 0.05  | 0.436 | [-0.08, 0.19] |
| Health counseling         | Post-intervention | Yes | 2.16  | 0.141 | 7   | 0.18  | 0.029 | [0.02, 0.35]  |
|                           |                   | No  |       |       | 9   | 0.02  | 0.728 | [-0.11, 0.16] |

*Note.*  $k$  = number of effect sizes;  $d$  = average meta-analytic effect size; CI= 95% confidence interval for  $d$ ;  $Q_b$  = heterogeneity between groups;  $p$  = significance level for  $d$  or for  $Q_b$ ; CBT = cognitive behavioral training.

*Table S3: Moderator tests for intervention effectivity on mental health: Formal characteristics of intervention*

| Variable                                        | Time    | <i>k</i> | Intercept | SE <sub>I</sub> | $\beta$ | SE <sub><math>\beta</math></sub> | <i>p</i> | <i>I</i> <sup>2</sup> <sub>residual</sub> |
|-------------------------------------------------|---------|----------|-----------|-----------------|---------|----------------------------------|----------|-------------------------------------------|
| Duration of Intervention<br>(in weeks)          | Post-I. | 31       | 0.287     | 0.0697          | -0.006  | 0.0032                           | 0.078    | 84.0%                                     |
| (max 9 weeks)                                   | Post-I. | 27       | 0.085     | 0.1148          | 0.061   | 0.0301                           | 0.041    | 79.8%                                     |
|                                                 | Fol.-up | 16       | 0.098     | 0.038           | 0.008   | 0.0134                           | 0.561    | 0.0%                                      |
| Intensity of intervention<br>(hours of contact) | Post-I. | 30       | 0.190     | 0.0780          | 0.002   | 0.0011                           | 0.139    | 81.8%                                     |
|                                                 | Fol.-up | 16       | 0.110     | 0.0319          | 0.000   | 0.0008                           | 0.852    | 0.0%                                      |
| Size of training groups                         | Post-I. | 21       | 0.299     | 0.1921          | -0.006  | 0.0158                           | 0.691    | 89.7%                                     |
|                                                 | Fol.-up | 10       | 0.154     | 0.1149          | -0.003  | 0.0088                           | 0.694    | 0.0%                                      |

*Note.* *k* = number of effect sizes; SE<sub>I</sub> = standard error of intercept;  $\beta$  = regression weight; SE <sub>$\beta$</sub>  = standard error of regression weight; *p* = significance level for beta; *I*<sup>2</sup><sub>residual</sub> = heterogeneity between studies remaining unexplained; Post-I. = post intervention; Fol.-up = follow up.

*Table S4: Moderator tests for intervention effectivity on physical health – formal characteristics of intervention*

| Variable                                     | Time    | <i>k</i> | Intercept | SE <sub>I</sub> | $\beta$ | SE <sub><math>\beta</math></sub> | <i>p</i> | <i>I</i> <sup>2</sup> <sub>residual</sub> |
|----------------------------------------------|---------|----------|-----------|-----------------|---------|----------------------------------|----------|-------------------------------------------|
| Duration of Intervention (in weeks)          | Post-I. | 15       | 0.077     | 0.0617          | -0.001  | 0.0019                           | 0.623    | 34.2%                                     |
| Intensity of intervention (hours of contact) | Post-I. | 12       | -0.014    | 0.0782          | 0.002   | 0.0018                           | 0.157    | 31.1%                                     |
| (max. 40 hours)                              | Post-I. | 11       | -0.173    | 0.1044          | 0.011   | 0.0046                           | 0.014    | 5.1%                                      |
| Size of training groups                      | Post-I. | 11       | -0.059    | 0.1048          | 0.004   | 0.0091                           | 0.695    | 17.1%                                     |

*Note.* *k* = number of effect sizes; SE<sub>I</sub> = standard error of intercept;  $\beta$  = regression weight; SE <sub>$\beta$</sub>  = standard error of regression weight; *p* = significance level for beta; *I*<sup>2</sup><sub>residual</sub> = heterogeneity between studies remaining unexplained; Post-I. = post intervention; Fol.-up = follow up.

*Table S5: Moderator tests for intervention effectivity on mental health – demographic characteristics*

| Variable        | Time    | <i>k</i> | Intercept | SE <sub>I</sub> | $\beta$ | SE <sub><math>\beta</math></sub> | <i>p</i> | <i>I</i> <sup>2</sup> <sub>residual</sub> |
|-----------------|---------|----------|-----------|-----------------|---------|----------------------------------|----------|-------------------------------------------|
| Percent. female | Post-I. | 32       | 0.241     | 0.2170          | 0.0007  | 0.0038                           | 0.905    | 88.0%                                     |
|                 | Fol.-up | 16       | 0.174     | 0.0962          | -0.001  | 0.0015                           | 0.514    | 0.0%                                      |
| Age             | Post-I. | 31       | 0.291     | 0.3618          | -0.003  | 0.0089                           | 0.762    | 86.4%                                     |
|                 | Fol.-up | 16       | 0.028     | 0.2309          | 0.002   | 0.0060                           | 0.711    | 0.0%                                      |
| Years Education | Post-I. | 14       | -0.455    | 0.9979          | 0.055   | 0.0830                           | 0.506    | 89.9%                                     |
| Unemp. duration | Post-I. | 23       | 0.191     | 0.1362          | -0.002  | 0.0032                           | 0.581    | 89.5%                                     |
|                 | Fol.-up | 14       | 0.072     | 0.0339          | 0.004   | 0.0023                           | 0.099    | 0.0%                                      |

*Note.* *k* = number of effect sizes; SE<sub>I</sub> = standard error of intercept;  $\beta$  = regression weight; SE <sub>$\beta$</sub>  = standard error of regression weight; *p* = significance level for beta; *I*<sup>2</sup><sub>residual</sub> = heterogeneity between studies remaining unexplained; Post-I. = post intervention; Fol.-up = follow up.

*Table S6: Moderator tests for intervention effectivity on physical health – demographic characteristics*

| Variable           | Time    | <i>k</i> | Intercept | SE <sub>I</sub> | $\beta$ | SE <sub><math>\beta</math></sub> | <i>p</i> | <i>I</i> <sup>2</sup> <sub>residual</sub> |
|--------------------|---------|----------|-----------|-----------------|---------|----------------------------------|----------|-------------------------------------------|
| Percent. female    | Post-I. | 14       | 0.201     | 0.2152          | -0.002  | 0.0039                           | 0.559    | 48.3%                                     |
| Age                | Post-I. | 16       | -0.277    | 0.4423          | 0.008   | 0.0100                           | 0.402    | 45.5%                                     |
| Unemp.<br>duration | Post-I. | 15       | -0.075    | 0.1281          | 0.004   | 0.0028                           | 0.157    | 41.7%                                     |

*Note.* *k* = number of effect sizes; SE<sub>I</sub> = Standard error of intercept;  $\beta$  = regression weight; SE <sub>$\beta$</sub>  = standard error of regression weight; *p* = significance level for beta; *I*<sup>2</sup><sub>residual</sub> = heterogeneity between studies remaining unexplained; Post-I. = post intervention.

Table S7: Moderator tests for intervention effectivity on mental health: – characteristics of study design

| Variable                       | Time           |                                           | $Q_b$ | $p$   | $k$ | $d$   | $p$    | 95% CI        |
|--------------------------------|----------------|-------------------------------------------|-------|-------|-----|-------|--------|---------------|
| Language                       | Post-interven. | English                                   | 0.47  | 0.493 | 28  | 0.24  | 0.001  | [0.09, 0.39]  |
|                                |                | German                                    |       |       | 4   | 0.06  | 0.794  | [-0.42, 0.54] |
| Study goals                    | Post-interven. | Health is...                              | 2.30  | 0.129 | 11  | 0.09  | 0.060  | [-0.00, 0.19] |
|                                |                | ...only goal                              |       |       | 21  | 0.26  | 0.009  | [0.06, 0.46]  |
|                                |                | ...one of several goals or secondary goal |       |       |     |       |        |               |
| Voluntariness of participation | Post-interven. | Likely voluntary                          | 6.04  | 0.014 | 27  | 0.29  | <0.001 | [0.15, 0.43]  |
|                                |                | Involuntary                               |       |       | 5   | -0.14 | 0.389  | [-0.45, 0.17] |
| Sample with health impairments | Post-interven. | Yes                                       | 0.08  | 0.778 | 8   | 0.27  | 0.269  | [-0.21, 0.74] |
|                                |                | No                                        |       |       | 24  | 0.20  | <0.001 | [0.08, 0.31]  |
| Randomization                  | Post-interven. | Yes                                       | 1.59  | 0.208 | 20  | 0.28  | 0.001  | [0.12, 0.45]  |
|                                |                | No                                        |       |       | 12  | 0.09  | 0.497  | [-0.16, 0.34] |
|                                | Follow-up      | Yes                                       | 0.38  | 0.537 | 10  | 0.11  | <0.001 | [0.06, 0.16]  |
|                                |                | No                                        |       |       | 6   | 0.16  | 0.044  | [0.00, 0.32]  |
| Treatment control group        | Post-interven. | No alternative treatment                  | 2.48  | 0.115 | 19  | 0.30  | 0.004  | [0.10, 0.51]  |
|                                |                | Alternat. treatment                       |       |       | 13  | 0.09  | 0.257  | [-0.07, 0.26] |
|                                |                | or standard training for unemp. ppl.      |       |       |     |       |        |               |

Note.  $k$  = number of effect sizes;  $d$  = average meta-analytic effect size; CI= 95% confidence interval for  $d$ ;  $Q_b$  = heterogeneity between groups;  $p$  = significance level for  $d$  or  $Q_b$ .

*Table S8: Moderator tests for intervention effectivity on physical health: – characteristics of study design*

| Variable                       | Time           |                                                     | $Q_b$ | $P$   | $k$ | $d$  | $p$   | 95% CI        |
|--------------------------------|----------------|-----------------------------------------------------|-------|-------|-----|------|-------|---------------|
| Language                       | Post-interven. | English                                             | 1.21  | 0.272 | 11  | 0.04 | 0.536 | [-0.09, 0.17] |
|                                |                | German                                              |       |       | 5   | 0.17 | 0.071 | [-0.01, 0.34] |
| Study goals                    | Post-interven. | Health is...                                        | 1.20  | 0.274 | 11  | 0.15 | 0.003 | [0.05, 0.24]  |
|                                |                | ...only goal                                        |       |       | 5   | 0.02 | 0.892 | [-0.20, 0.23] |
|                                |                | ...one of several goals or secondary goal           |       |       | 5   | 0.02 | 0.892 | [-0.20, 0.23] |
| Voluntariness of participation | Post-interven. | Likely voluntary                                    | 1.82  | 0.177 | 12  | 0.04 | 0.583 | [-0.10, 0.17] |
|                                |                | Involuntary                                         |       |       | 4   | 0.18 | 0.023 | [0.03, 0.34]  |
| Sample with health impairments | Post-interven. | Yes                                                 | 0.44  | 0.506 | 5   | 0.14 | 0.133 | [-0.04, 0.33] |
|                                |                | No                                                  |       |       | 11  | 0.06 | 0.351 | [-0.07, 0.20] |
| Randomization                  | Post-interven. | Yes                                                 | 1.78  | 0.183 | 6   | 0.01 | 0.953 | [-0.17, 0.18] |
|                                |                | No                                                  |       |       | 10  | 0.16 | 0.024 | [0.02, 0.29]  |
| Treatment control group        | Post-interven. | No alternative treatment                            | 0.65  | 0.419 | 10  | 0.05 | 0.594 | [-0.14, 0.23] |
|                                |                | Alt. treatment or standard training for unemp. ppl. |       |       | 6   | 0.14 | 0.010 | [0.03, 0.24]  |

*Note.*  $k$  = number of effect sizes;  $d$  = average meta-analytic effect size; CI= 95% confidence interval for  $d$ ;  $Q_b$ = heterogeneity between groups;  $p$  = significance level for  $d$  or  $Q_b$ .

## SUPPLEMENTARY ONLINE MATERIAL - C

**List of primary studies used in meta-analysis**

- Caplan, R. D., Vinokur, A. D., Price, R. H., & Van Ryn, M. (1989). Job seeking, reemployment, and mental health: A randomized field experiment in coping with job loss. *Journal of Applied Psychology*, 74(5), 759-769. <https://doi.org/10.1037/0021-9010.74.5.759>
- Carlier, B. E., Schuring, M., & Burdorf, A. (2018). Influence of an interdisciplinary re-employment programme among unemployed persons with mental health problems on health, social participation and paid employment. *Journal of Occupational Rehabilitation*, 28(1), 147-157. <https://doi.org/10.1007/s10926-017-9704-3>
- Creed, P. A., Bloxsome, T. D., & Johnston, K. (2001). Self-esteem and self-efficacy outcomes for unemployed individuals attending occupational skills training programs. *Community, Work & Family*, 4(3), 285-303. <https://doi.org/10.1080/01405110120089350>
- Creed, P. A., Hicks, R. E., & Machin, M. A. (1998). Behavioural plasticity and mental health outcomes for long-term unemployed attending occupational training programmes. *Journal of Occupational and Organizational Psychology*, 71(2), 171-191. <https://doi.org/10.1111/j.2044-8325.1998.tb00671.x>
- Creed, P. A., Machin, M. A., & Hicks, R. E. (1999). Improving mental health status and coping abilities for long-term unemployed youth using cognitive-behaviour therapy based training interventions. *Journal of Organizational Behaviour*, 20, 963-978. [https://doi.org/10.1002/\(SICI\)1099-1379\(199911\)20:6<963::AID-JOB916>3.0.CO;2-D](https://doi.org/10.1002/(SICI)1099-1379(199911)20:6<963::AID-JOB916>3.0.CO;2-D)
- Dambrun, M., & Dubuy, A.-L. (2014). A positive psychology intervention among long-term unemployed people and its effects on psychological distress and well-being. *Journal of Employment Counseling*, 51, 75-88. <https://doi.org/10.1002/j.2161-1920.2014.00043.x>
- De Jong, A., Hommes, M., Brouwers, A. & Tomic, W. (2013). Effects of mindfulness-based stress reduction course on stress, mindfulness, job self-efficacy and motivation among unemployed people. *Australian Journal of Career Development*, 22(2), 51-62. <https://doi.org/10.1177/1038416213486095>
- Gabrys, L., Michallik, L., Thiel, C., Vogt, L., & Banzer, W. (2013). Effects of a structured physical-activity counseling and referral scheme in long-term unemployed individuals: a pilot accelerometer study. *Behavioral Medicine*, 39(2), 44-50. <https://doi.org/10.1080/08964289.2013.782852>
- Hanewinkel, R., Wewel, M., Stephan, C., Isensee, B., & Wiborg, G. (2006). Motivational interviewing of unemployed – acceptance and effects of counselling to improve health-related behavior. *Gesundheitswesen*, 68(4), 240-248. <https://doi.org/10.1055/s-2006-926693>
- Harris, E., Lum, J., Rose, V., Morrow, M., Comino, E., & Harris, M. (2002). Are CBT interventions effective with disadvantaged job-seekers who are long-term unemployed? *Psychology, Health & Medicine*, 7(4), 401-410. <https://doi.org/10.1080/1354850021000015221>
- Harry, J. M., & Tiggemann, M. (Mai 1992). The psychological impact of work re-entry training for female unemployed sole parents. *Australian Journal of Social Issues*, 27(2), 75-91. <https://doi.org/10.1002/j.1839-4655.1992.tb01279.x>
- Herbig, B., Glaser, J., & Angerer, P. (2012). Old, sick, unemployed, without a chance? Results of a randomized controlled trial of the effects of a combined health and employment

- promotion program for the older long-term unemployed. *Bundesgesundheitsblatt - Gesundheitsforschung - Gesundheitsschutz*, 55(8), 970-979. <https://doi.org/10.1007/s00103-012-1514-3>
- Himle, J. A., Bybee, D., Steinberger, E., Laviolette, W. T., Weaver, A., Vlnka, S., . . . O'Donnell, L. A. (2014). Work-related CBT versus vocational services as usual for unemployed persons with social anxiety disorder: A randomized controlled pilot trial. *Behaviour Research and Therapy*, 169-176. <https://doi.org/10.1016/j.brat.2014.10.005>
- Hodzic, S., Ripoll, P., Bernal, C., & Zenasni, F. (2015). The effects of emotional competences training among unemployed adults: A longitudinal study. *Applied Psychology: Health and Well-Being*, 7(3), 275-292. <https://doi.org/10.1111/aphw.12048>
- Hong, P. Y., Choi, S., & Hong, R. (2020). A randomized controlled trial study of transforming impossible into possible (TIP) policy experiment in South Korea. *Research on Social Work Practice*, 30(6), 587-596. <https://doi.org/10.1177/1049731519894647>
- Horns, K., Seeger, K., Heinmüller, M., Limm, H., Waldhoff, H.-P., Salman, R., Gündel, H., & Angerer, P. (2012). Health promotion for long-term unemployed. Effects on motivation for a healthy lifestyle. *Bundesgesundheitsblatt*, 55, 728-738. <https://doi.org/10.1007/s00103-012-1477-4>
- Hulshof, I. L., Demerouti, E., & Le Blanc, P. M. (2020). A job search demands-resources intervention among the unemployed: Effects on well-being, job search behaviour and reemployment chances. *Journal of Occupational Health Psychology*, 25(1), 17-31. <https://doi.org/10.1037/ocp0000167>
- Joseph, L. M., & Greenberg, M. A. (2001). The effects of a career transition program on reemployment success in laid-off professionals. *Consulting Psychology Journal: Practice and Research*, 53(3), S. 169-181. <https://doi.org/10.1037/1061-4087.53.3.169>
- Kellner, A. (2021). Arbeitsförderung mit gesundheitsbezogener Ausrichtung – AmigA seit 2008 im Jobcenter MAIA des Landkreises Potsdam-Mittelmark. In: Holleder, A. (Hrsg.), *Gesundheitsförderung bei Arbeitslosen* (pp. 318-333). Frankfurt am Main: Fachhochschulverlag. <https://doi.org/>
- Limm, H., Heinmüller, M., Gündel, H., Liel, K., Seeger, K., Salman, R., & Angerer, P. (2015). Effects of a health promotion program based on a train-the-trainer approach on quality of life and mental health of long-term unemployed persons. *BioMed Research International*, Volume 2015, pp. 1-10. <https://doi.org/10.1155/2015/719327>
- Möllmann, C. (2009). *Evaluation einer gesundheitsbezogenen Maßnahme - Arbeitsförderung mit gesundheitsbezogener Ausrichtung*. Abschlussbericht zum Projekt AmigA+. Berlin.
- Machin, M. A., & Creed, P. A. (2003). Understanding the differential benefits of training for the unemployed. *Australian Journal of Psychology*, 55, 104-113. <https://doi.org/10.1080/00049530412331312964>
- Maguire, N., Hughes, V. C., Bell, L., Bogosian, A., & Hepworth, C. (2014). An evaluation of the choices for well-being project. *Psychology, Health & Medicine*, 19(3), 303-315. <https://doi.org/10.1080/13548506.2013.806813>
- Maysent, A. M. (1995). *Coping with job loss and career stress: Effectiveness of stress management training with outplaced employees*. In Murphy, L. R., Hurrell, J. J., Sauter, Jr., S. L., & Keita, G. P. (Hrsg.), *Job stress interventions* (pp. 159-170). American Psychological Association. <https://doi.org/10.1037/10183-011>
- Merakou, K., Tsoukas, K., Stavrinou, G., Amanaki, E., Daleziou, A., Kourmoussi, N., . . . Barbouni, A. (2019). The Effect of progressive muscle relaxation on emotional competence: Depression-anxiety-stress, sense of coherence, health-related quality of

- life, and well-being of unemployed people in Greece: An intervention study. *Explore*, 15(1), 38-46. <https://doi.org/10.1016/j.explore.2018.08.001>
- Muller, J. (1992). The effects of personal training on the psychological state of long-term unemployed women. *Australian Psychologist*, 27(3), 176-180. <https://doi.org/10.1080/00050069208257607>
- Paver, R., De Witte, H., Rothmann, S., Van den Broeck, A., & Blonk, R. W. B. (2020). The implementation and evaluation of the South African adaptation of the JOBS program. *Frontiers Psychology*, 11, 1-13. <https://doi.org/10.3389/fpsyg.2020.01418>
- Proudfoot, J., Guest, D., Carson, J., Dunn, G., & Gray, J. (1997). Effect of cognitive-behavioural training on job-finding among long-term unemployed people. *Lancet*, 350(9071), 96-100. [https://doi.org/10.1016/S0140-6736\(96\)09097-6](https://doi.org/10.1016/S0140-6736(96)09097-6)
- Reynolds, C., Barry, M. M., & Gabhainn, S. N. (2010). Evaluating the impact of the winning new jobs programme on the re-employment and mental health of a mixed profile of unemployed people. *International Journal of Mental Health Promotion*, 12(2), 32-41. <https://doi.org/10.1080/14623730.2010.9721812>
- Roemer, A., Sutton, A., Grimm, C., & Medvedev, O. N. (2021). Effectiveness of a low-dose mindfulness-based intervention for alleviating distress in young unemployed adults. *Stress & Health*, 37(2), 320-328. <https://doi.org/10.1002/smi.2997>
- Rothländer, K., Mühlfordt, S., & Richter, P. (2012). Evaluation of the health promotion program 'Active coping with unemployment (AktivA)'. *Zeitschrift für Gesundheitspsychologie*, 20(3), 115-127. <https://doi.org/10.1026/0943-8149/a000070>
- Rüsch, N., Staiger, T., Waldmann, T., Dekoj, M. C., Brosch, T., Gabriel, L., Bahemann, A., Oexle, N., Klein, T., Nehf, L., & Becker, T. (2019). Efficacy of peer-led group program for unemployed people with mental health problems: Pilot randomized controlled trial. *International Journal of Social Psychiatry*, 65(4), 333-337. <https://doi.org/10.1177/0140613219844661>
- Saam, R. H., Wodtke, K. H. & Hains, A. A. (1995). A cognitive stress reduction program for recently unemployed managers. *The career development quarterly*, 44(1), 43-51. <https://doi.org/10.1002/j.2161-0045.1995.tb00527.x>
- Schuring, M., Burdorf, A., Voorham, A. J., der Weduwe, K., & Mackenbach, J. P. (2009). Effectiveness of a health promotion programme for long-term unemployed subjects with health problems: A randomised controlled trial. *Journal of Epidemiology and Community Health*, 63(11), 893-899. <https://doi.org/10.1136/jech.2008.080432>
- Vinokur, A. D., Price, R. H., & Schul, Y. (1995). Impact of the JOBS intervention on unemployed workers varying in risk for depression. *American Journal of Community Psychology*, 23(1), 39-74. <https://doi.org/10.1007/BF02506922>
- Vinokur, A.D., van Ryan, M., Gramlich, E. M., & Price, R. H. (1991). Long-term follow-up and benefit-cost analysis of the JOBS program: A preventive intervention for the unemployed. *Journal of Applied Psychology*, 76(2), 213-219. <https://doi.org/10.1037/0021-9010.76.2.213>
- Vuori, J., & Silvonen, J. (2005). The benefits of a preventive job search program on re-employment and mental health at 2-year follow up. *Journal of Occupational and Organizational Psychology*, 78(1), 43-52. <https://doi.org/10.1348/096317904X23790>

*SUPPLEMENTARY ONLINE MATERIAL - D: Forest plots depicting each primary study's effect size and confidence interval*

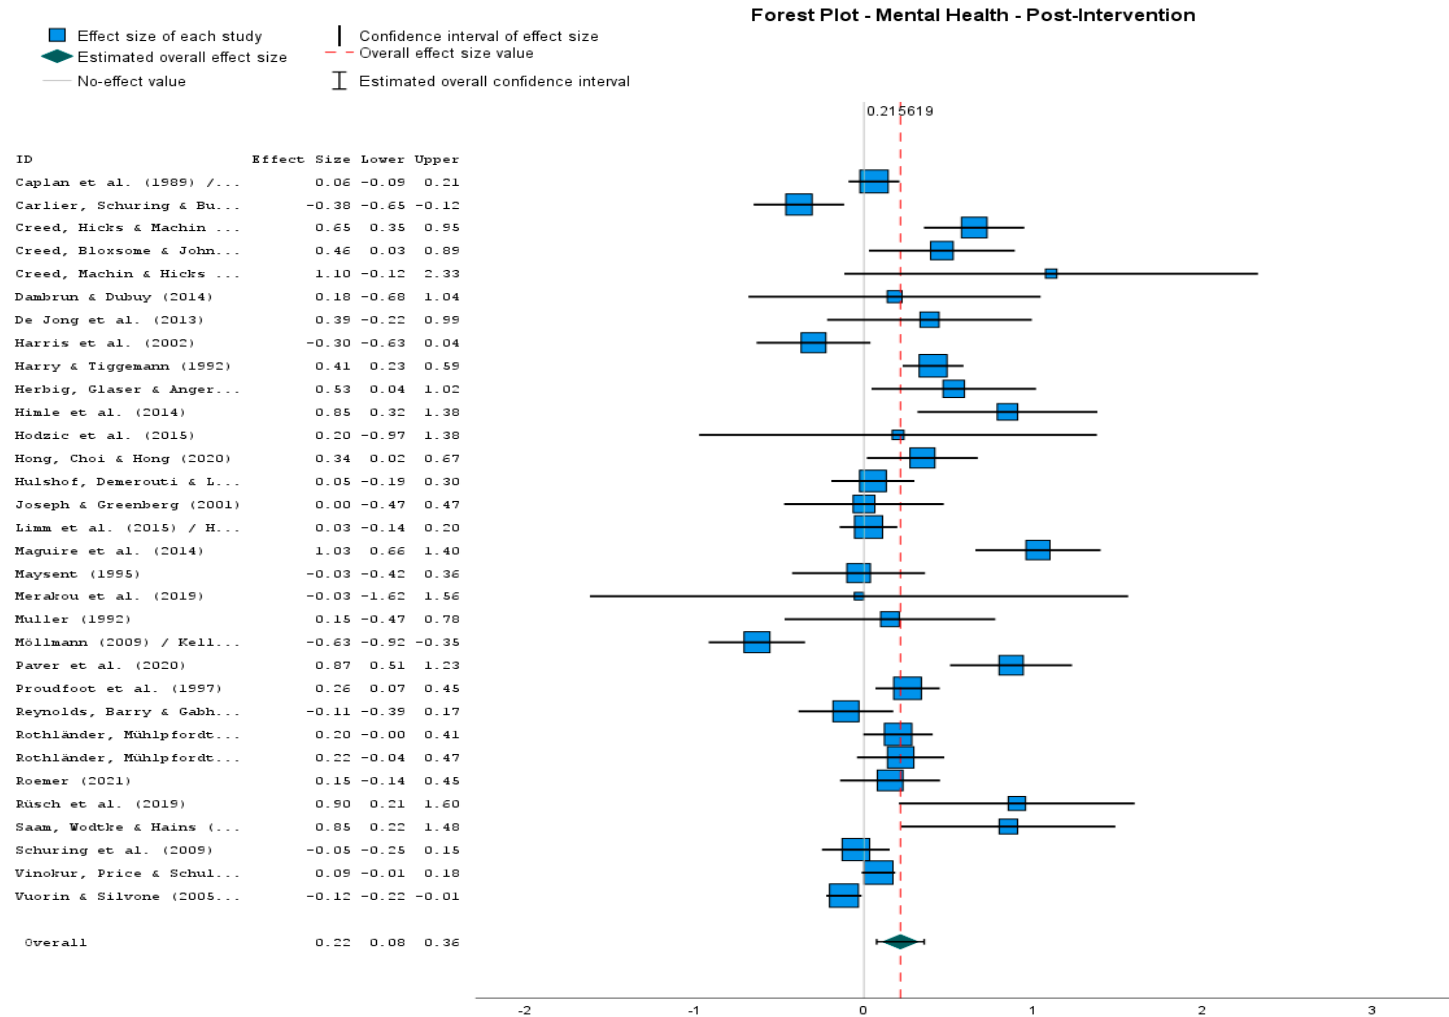

Forest Plot - Physical Health - Post Intervention

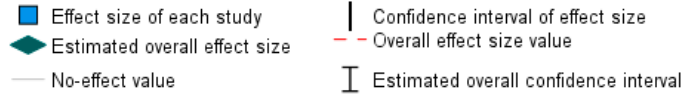

| ID                        | Effect Size | Lower | Upper |
|---------------------------|-------------|-------|-------|
| Carlier, Schuring & Bu... | -0.06       | -0.33 | 0.22  |
| Gabrys et al. (2013)      | 0.73        | -0.19 | 1.66  |
| Gabrys et al. (2013)      | 0.25        | -0.65 | 1.16  |
| Hanewinkel et al. (2006)  | -0.13       | -0.42 | 0.16  |
| Herbig, Glaser & Anger... | 0.00        | -0.48 | 0.48  |
| Hodzic et al. (2015)      | -0.25       | -0.70 | 0.21  |
| Hulshof, Demerouti & L... | -0.18       | -0.43 | 0.06  |
| Limm et al. (2015) / H... | 0.24        | -0.00 | 0.48  |
| Maysent (1995)            | 0.14        | -0.25 | 0.53  |
| Merakou et al. (2019)     | -0.00       | -0.57 | 0.56  |
| Muller (1992)             | 0.25        | -0.69 | 1.20  |
| Möllmann (2009) / Kell... | 0.38        | 0.14  | 0.63  |
| Reynolds, Barry & Gabh... | -0.09       | -0.37 | 0.19  |
| Rothländer, Mühlpfordt... | 0.18        | -0.03 | 0.38  |
| Rothländer, Mühlpfordt... | 0.26        | 0.01  | 0.52  |
| Schuring et al. (2009)    | 0.18        | -0.03 | 0.40  |
| Overall                   | 0.09        | -0.02 | 0.20  |

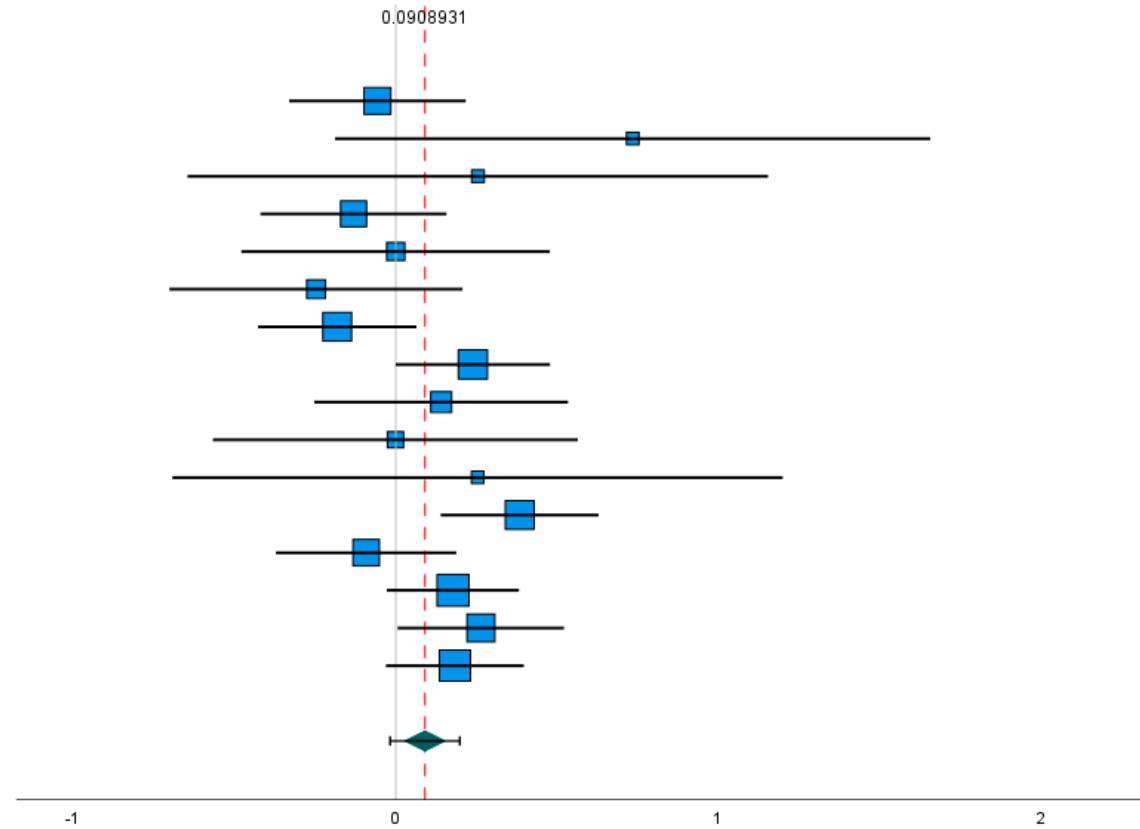

Forest Plot - Health Behavior (Physical Activity) - Post Intervention

- Effect size of each study
- ◆

 Estimated overall effect size
- No-effect value
- |

 Confidence interval of effect size
- Overall effect size value
- I

 Estimated overall confidence interval

| ID                        | Effect Size | Lower | Upper |
|---------------------------|-------------|-------|-------|
| Gabrys et al. (2013)      | 0.76        | -0.16 | 1.69  |
| Gabrys et al. (2013)      | -0.05       | -0.95 | 0.85  |
| Hanewinkel et al. (2006)  | 0.12        | -0.16 | 0.41  |
| Limm et al. (2015) / H... | 0.42        | 0.18  | 0.67  |
| Möllmann (2009) / Kell... | 0.30        | -0.01 | 0.61  |
| Overall                   | 0.30        | 0.13  | 0.47  |

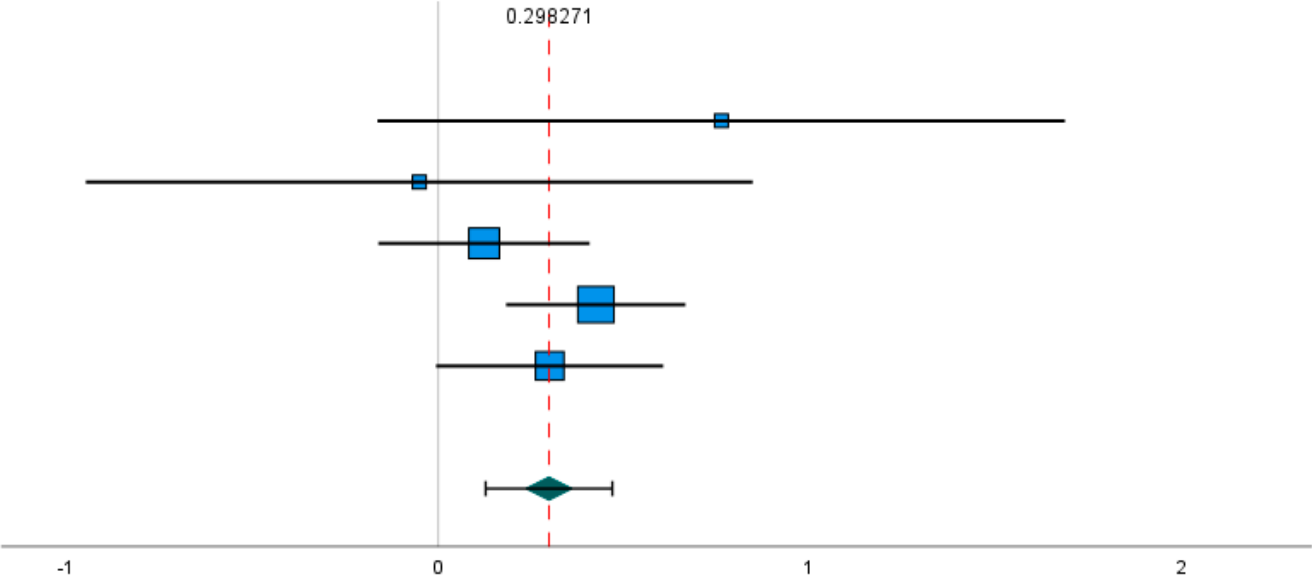

# Forest Plot - Mental Health - Follow-Up

- Effect size of each study
- Estimated overall effect size
- No-effect value
- Confidence interval of effect size
- Overall effect size value
- Estimated overall confidence interval

| ID                        | Effect Size | Lower | Upper |
|---------------------------|-------------|-------|-------|
| Caplan et al. (1989) /... | 0.03        | -0.13 | 0.20  |
| Creed, Hicks & Machin ... | 0.27        | -0.09 | 0.62  |
| Creed, Bloxsome & John... | -0.27       | -0.87 | 0.33  |
| Dambrun & Dubuy (2014)    | 0.31        | -0.43 | 1.05  |
| Himle et al. (2014)       | 0.72        | -0.78 | 2.22  |
| Hodzic et al. (2015)      | 0.13        | -1.12 | 1.38  |
| Hulshof, Demerouti & L... | 0.00        | -0.26 | 0.26  |
| Joseph & Greenberg (2001) | 0.00        | -0.47 | 0.47  |
| Machin & Creed (2003)     | 0.16        | -0.92 | 1.23  |
| Muller (1992)             | 0.65        | -0.14 | 1.44  |
| Proudfoot et al. (1997)   | 0.20        | 0.01  | 0.39  |
| Rothländer, Mühlpfordt... | 0.09        | -0.17 | 0.35  |
| Rothländer, Mühlpfordt... | 0.19        | -0.10 | 0.47  |
| Rüsch et al. (2019)       | 0.74        | 0.02  | 1.47  |
| Vinokur, Price & Schul... | 0.13        | 0.03  | 0.23  |
| Vuorin & Silvone (2005... | 0.10        | 0.03  | 0.17  |
| Overall                   | 0.11        | 0.06  | 0.16  |

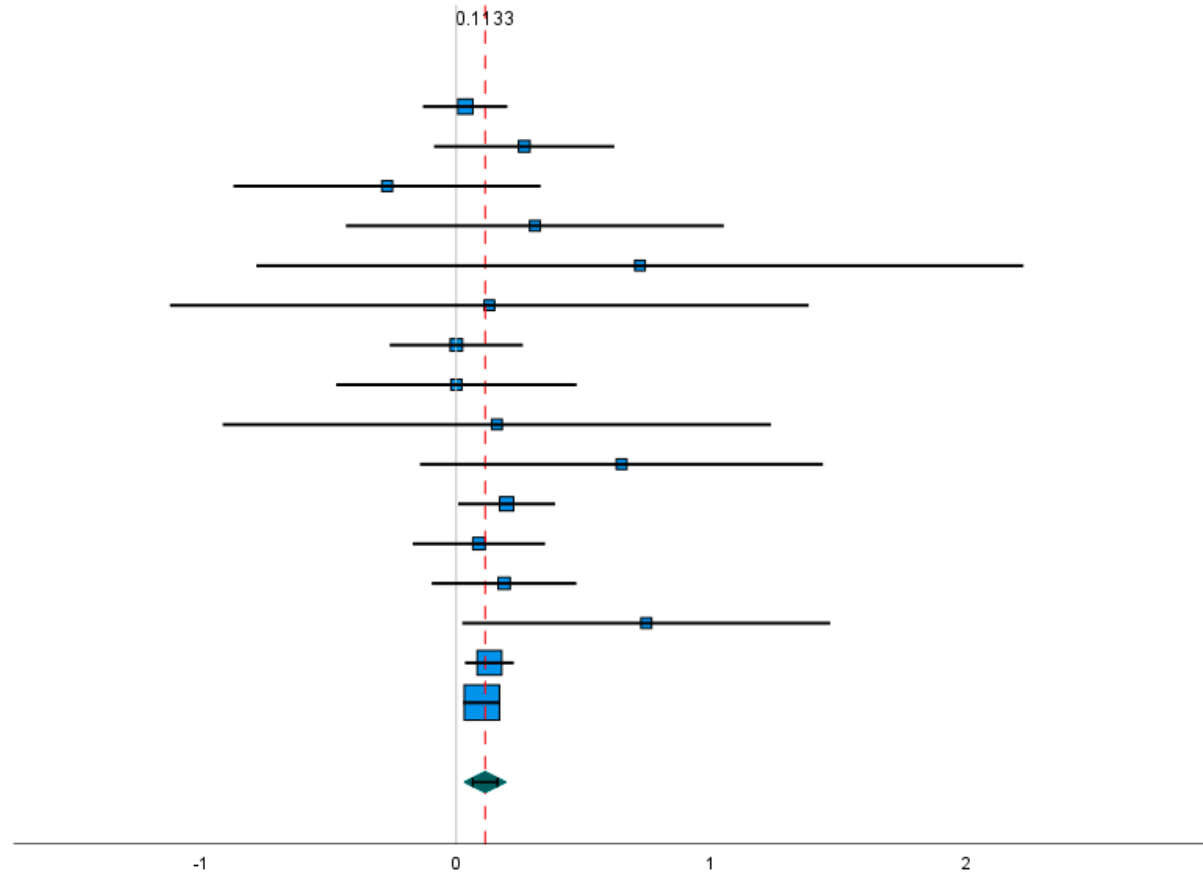

Forest Plot - Physical Health (Physical Activity) - Follow-Up

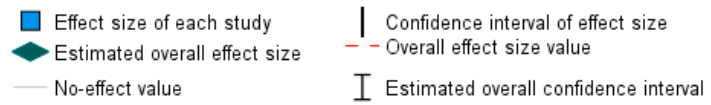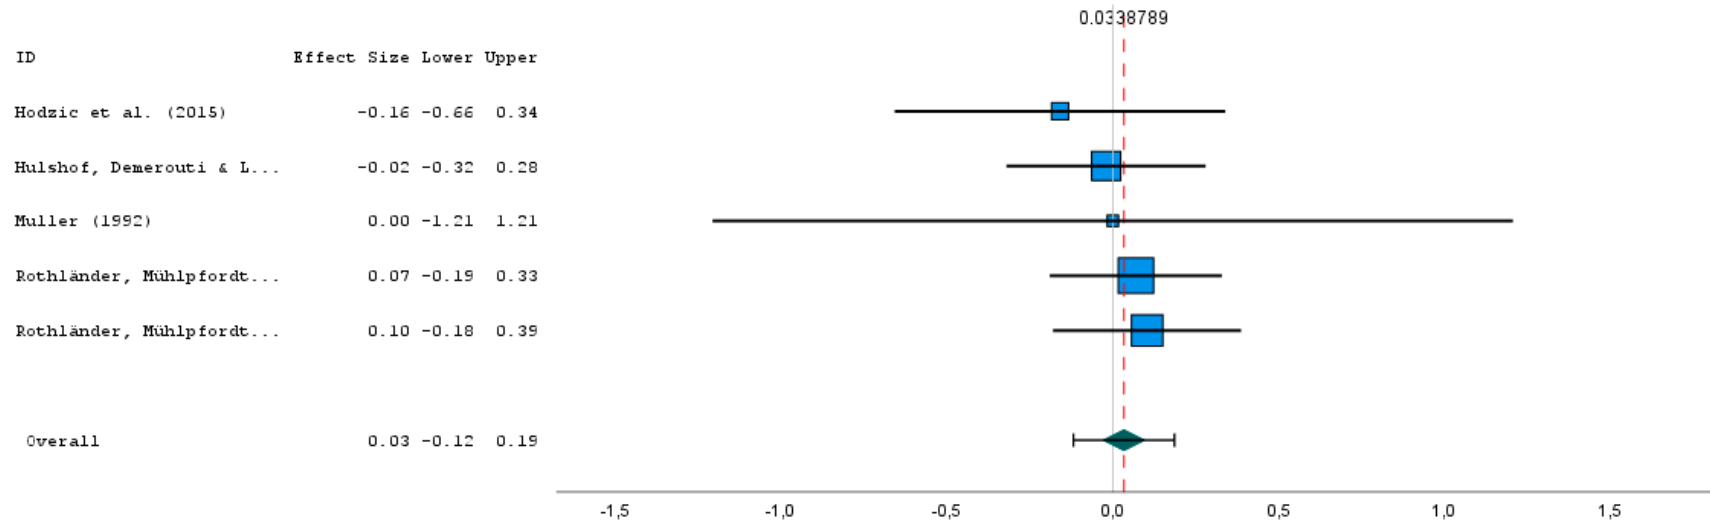

*SUPPLEMENTARY ONLINE MATERIAL - E1: Tables with codings of study characteristics*

**Codings of formal characteristics of intervention & demographics**

|                                        | Duration of<br>intervention<br>(weeks) | Intensity of<br>intervention<br>(number of hours<br>average participant<br>received treatment) | Number of<br>participant<br>s per<br>training<br>group | Percentage of<br>women in<br>sample | Average<br>age of the<br>sample | Average<br>years of<br>formal<br>education | mean<br>duration of<br>unemploym<br>ent |
|----------------------------------------|----------------------------------------|------------------------------------------------------------------------------------------------|--------------------------------------------------------|-------------------------------------|---------------------------------|--------------------------------------------|-----------------------------------------|
| Caplan et al. (1989)                   | 2,00                                   | 24,00                                                                                          | 18                                                     | 54,00                               | 35,90                           | 12,90                                      | 3,00                                    |
| Carlier et al. (2017)                  | 104,29                                 | -88,00                                                                                         | 1                                                      | 55,07                               | 40,50                           | -88,00                                     | 53,63                                   |
| Creed et al. (1998)                    | 5,50                                   | 220,00                                                                                         | -88                                                    | 45,86                               | 33,00                           | -88,00                                     | -88,00                                  |
| Creed et al. (1999)                    | ,43                                    | 15,00                                                                                          | -88                                                    | 46,00                               | 19,00                           | -88,00                                     | -88,00                                  |
| Creed et al. (2001)                    | 5,00                                   | 200,00                                                                                         | -88                                                    | 55,56                               | 27,73                           | -88,00                                     | 10,87                                   |
| Dambrun & Dubuy (2014)                 | 2,00                                   | 1,00                                                                                           | 1                                                      | 52,38                               | 41,00                           | -88,00                                     | 15,41                                   |
| De Jong et al. (2013)                  | 8,00                                   | 20,00                                                                                          | 20                                                     | 60,00                               | 46,67                           | 13,12                                      | -88,00                                  |
| Gabrys et al. (2013)-PAC               | 2,21                                   | -88,00                                                                                         | 1                                                      | -88,00                              | 54,94                           | -88,00                                     | 64,96                                   |
| Gabrys et al. (2013)-PAC + Exercise    | 14,21                                  | -88,00                                                                                         | 1                                                      | -88,00                              | 54,73                           | -88,00                                     | 47,78                                   |
| Hanewinkel et al. (2006)               | ,14                                    | 1,00                                                                                           | 1                                                      | 41,59                               | 44,39                           | 12,09                                      | 29,51                                   |
| Harris et al. (2002)                   | ,29                                    | 11,00                                                                                          | 7                                                      | 50,00                               | 35,00                           | -88,00                                     | 39,00                                   |
| Harry & Tiggemann (1992)               | 3,29                                   | 136,00                                                                                         | 10                                                     | 100,00                              | 35,00                           | -88,00                                     | -88,00                                  |
| Herbig et al. (2012)                   | 25,98                                  | 10,97                                                                                          | 1                                                      | 52,11                               | 53,34                           | 9,85                                       | 46,65                                   |
| Himle et al. (2014)                    | 4,00                                   | 16,00                                                                                          | 4                                                      | 32,80                               | 43,59                           | 11,71                                      | -88,00                                  |
| Hodzic et al. (2015)                   | 2,42                                   | 15,00                                                                                          | 10                                                     | 86,60                               | 34,37                           | -88,00                                     | 16,89                                   |
| Hong et al. (2016)                     | 1,20                                   | 20,00                                                                                          | 8                                                      | 53,25                               | 49,85                           | -88,00                                     | -88,00                                  |
| Hulshof et al. (2020)                  | 6,29                                   | 14,00                                                                                          | 12                                                     | 56,51                               | 50,77                           | -88,00                                     | 15,92                                   |
| Joseph & Greenberg (2001)              | 2,00                                   | 3,00                                                                                           | -88                                                    | 40,00                               | 46,80                           | -88,00                                     | 2,30                                    |
| Limm et al. (2015)/Horns et al. (2012) | 12,99                                  | 37,50                                                                                          | -88                                                    | 56,10                               | 44,10                           | 10,50                                      | 68,63                                   |

|                                              |        |        |     |        |        |        |        |
|----------------------------------------------|--------|--------|-----|--------|--------|--------|--------|
| Machin & Creed (2003)                        | ,29    | 16,00  | 8   | 81,32  | 33,99  | 11,08  | 42,17  |
| Maguire et al. (2014)                        | 5,00   | 80,00  | 9   | 59,70  | -88,00 | -88,00 | 28,24  |
| Maysent (1995)                               | 1,00   | 6,00   | -88 | 8,85   | 46,67  | -88,00 | -88,00 |
| Merakou et al. (2018)                        | 8,60   | 27,40  | 7   | 54,00  | 33,52  | 12,07  | 36,00  |
| Möllmann (2009)/Kellner (2021)               | -88,00 | -88,00 | -88 | 45,98  | 41,54  | 9,69   | 54,68  |
| Muller (1992)                                | 1,00   | 40,00  | 11  | 100,00 | 38,00  | -88,00 | 132,00 |
| Paver et al. (2020)                          | 1,00   | 20,00  | 18  | 60,62  | 30,76  | 10,70  | 36,40  |
| Proudfoot et al. (1997)                      | 7,00   | 21,00  | 13  | 17,00  | 43,00  | -88,00 | 24,58  |
| Reynolds et al. (2010)                       | 1,50   | 20,00  | 17  | 58,80  | 33,83  | 11,99  | 47,96  |
| Roemer et al. (2017)                         | 4,00   | 4,00   | -88 | 35,60  | 20,03  | -88,00 | -88,00 |
| Rothländer et al. (2012) - freely accessible | 3,00   | 24,00  | -88 | 62,26  | 49,56  | 13,49  | 20,39  |
| Rothländer et al. (2012) - integrated        | 3,00   | 24,00  | -88 | 60,13  | 45,23  | 12,88  | 22,97  |
| Rüsch et al. (2019)                          | 6,00   | 8,00   | -88 | 52,00  | 46,10  | 13,50  | 46,30  |
| Saam et al. (1995)                           | 4,00   | 5,50   | 1   | 19,05  | 46,00  | -88,00 | -88,00 |
| Schuring et al. (2009)                       | 12,00  | 108,00 | 17  | 49,16  | 41,22  | 11,08  | 48,54  |
| Vinokur et al. (1995)                        | 1,00   | 20,00  | 16  | 55,00  | 36,20  | 13,95  | ,95    |
| Vuori & Silvonen (2005)                      | 1,00   | 20,00  | 10  | 77,80  | 37,00  | -88,00 | 10,70  |

SUPPLEMENTARY ONLINE MATERIAL - E2: Tables with codings of study characteristics

**Coding of study characteristics**

|                                     | Language of study report | Importance of health as goal of intervention  | Level of voluntariness of participation | Sample with health impairments            | Randomization dichotomous | Treatment control group                                            |
|-------------------------------------|--------------------------|-----------------------------------------------|-----------------------------------------|-------------------------------------------|---------------------------|--------------------------------------------------------------------|
| Caplan et al. (1989)                | English                  | Health one of several goals or secondary goal | high level of voluntariness             | Sample has preexisting health impairments | randomization             | no training/waiting list/booklet                                   |
| Carlier et al. (2017)               | English                  | Health one of several goals or secondary goal | low level of voluntariness              | No health impairments                     | no randomization          | course or training for unemployed or spec. designed alt. treatment |
| Creed et al. (1998)                 | English                  | Health one of several goals or secondary goal | high level of voluntariness             | Sample has preexisting health impairments | no randomization          | no training/waiting list/booklet                                   |
| Creed et al. (1999)                 | English                  | Health only goal                              | high level of voluntariness             | Sample has preexisting health impairments | no randomization          | no training/waiting list/booklet                                   |
| Creed et al. (2001)                 | English                  | Health one of several goals or secondary goal | high level of voluntariness             | Sample has preexisting health impairments | no randomization          | no training/waiting list/booklet                                   |
| Dambrun & Dubuy (2014)              | English                  | Health only goal                              | high level of voluntariness             | Sample has preexisting health impairments | no randomization          | course or training for unemployed or spec. designed alt. treatment |
| De Jong et al. (2013)               | English                  | Health one of several goals or secondary goal | high level of voluntariness             | Sample has preexisting health impairments | randomization             | no training/waiting list/booklet                                   |
| Gabrys et al. (2013)-PAC            | English                  | Health only goal                              | high level of voluntariness             | Sample has preexisting health impairments | no randomization          | no training/waiting list/booklet                                   |
| Gabrys et al. (2013)-PAC + Exercise | English                  | Health only goal                              | high level of voluntariness             | Sample has preexisting health impairments | no randomization          | no training/waiting list/booklet                                   |
| Hanewinkel et al. (2006)            | German                   | Health only goal                              | high level of voluntariness             | Sample has preexisting health impairments | randomization             | no training/waiting list/booklet                                   |

|                                        |         |                                               |                            |                                           |                  |                                                                    |
|----------------------------------------|---------|-----------------------------------------------|----------------------------|-------------------------------------------|------------------|--------------------------------------------------------------------|
| Harris et al. (2002)                   | English | Health one of several goals or secondary goal | high level of voluntarines | Sample has preexisting health impairments | randomization    | course or training for unemployed or spec. designed alt. treatment |
| Harry & Tiggemann (1992)               | English | Health one of several goals or secondary goal | high level of voluntarines | Sample has preexisting health impairments | randomization    | no training/waiting list/booklet                                   |
| Herbig et al. (2012)                   | German  | Health one of several goals or secondary goal | high level of voluntarines | No health impairments                     | randomization    | no training/waiting list/booklet                                   |
| Himle et al. (2014)                    | English | Health one of several goals or secondary goal | high level of voluntarines | No health impairments                     | randomization    | course or training for unemployed or spec. designed alt. treatment |
| Hodzic et al. (2015)                   | English | Health only goal                              | high level of voluntarines | Sample has preexisting health impairments | randomization    | no training/waiting list/booklet                                   |
| Hong et al. (2016)                     | English | Health one of several goals or secondary goal | high level of voluntarines | Sample has preexisting health impairments | randomization    | no training/waiting list/booklet                                   |
| Hulshof et al. (2020)                  | English | Health one of several goals or secondary goal | high level of voluntarines | Sample has preexisting health impairments | randomization    | no training/waiting list/booklet                                   |
| Joseph & Greenberg (2001)              | English | Health one of several goals or secondary goal | high level of voluntarines | Sample has preexisting health impairments | randomization    | course or training for unemployed or spec. designed alt. treatment |
| Limm et al. (2015)/Horns et al. (2012) | English | Health only goal                              | high level of voluntarines | Sample has preexisting health impairments | randomization    | course or training for unemployed or spec. designed alt. treatment |
| Machin & Creed (2003)                  | English | Health only goal                              | high level of voluntarines | Sample has preexisting health impairments | randomization    | course or training for unemployed or spec. designed alt. treatment |
| Maguire et al. (2014)                  | English | Health one of several goals or secondary goal | high level of voluntarines | No health impairments                     | randomization    | no training/waiting list/booklet                                   |
| Maysent (1995)                         | English | Health only goal                              | high level of voluntarines | Sample has preexisting health impairments | no randomization | no training/waiting list/booklet                                   |
| Merakou et al. (2018)                  | English | Health only goal                              | high level of voluntarines | No health impairments                     | no randomization | no training/waiting list/booklet                                   |
| Möllmann (2009)/Kellner (2021)         | German  | Health one of several goals or secondary goal | low level of voluntariness | No health impairments                     | no randomization | no training/waiting list/booklet                                   |

|                                              |         |                                               |                            |                                           |                  |                                                                    |
|----------------------------------------------|---------|-----------------------------------------------|----------------------------|-------------------------------------------|------------------|--------------------------------------------------------------------|
| Muller (1992)                                | English | Health only goal                              | high level of voluntarines | Sample has preexisting health impairments | no randomization | no training/waiting list/booklet                                   |
| Paver et al. (2020)                          | English | Health one of several goals or secondary goal | high level of voluntarines | Sample has preexisting health impairments | randomization    | no training/waiting list/booklet                                   |
| Proudfoot et al. (1997)                      | English | Health one of several goals or secondary goal | high level of voluntarines | Sample has preexisting health impairments | randomization    | course or training for unemployed or spec. designed alt. treatment |
| Reynolds et al. (2010)                       | English | Health one of several goals or secondary goal | high level of voluntarines | Sample has preexisting health impairments | no randomization | course or training for unemployed or spec. designed alt. treatment |
| Roemer et al. (2017)                         | English | Health only goal                              | low level of voluntariness | Sample has preexisting health impairments | randomization    | course or training for unemployed or spec. designed alt. treatment |
| Rothländer et al. (2012) - freely accessible | German  | Health only goal                              | high level of voluntarines | Sample has preexisting health impairments | no randomization | course or training for unemployed or spec. designed alt. treatment |
| Rothländer et al. (2012) - integrated        | German  | Health only goal                              | low level of voluntariness | Sample has preexisting health impairments | no randomization | course or training for unemployed or spec. designed alt. treatment |
| Rüsch et al. (2019)                          | English | Health one of several goals or secondary goal | high level of voluntarines | No health impairments                     | randomization    | no training/waiting list/booklet                                   |
| Saam et al. (1995)                           | English | Health one of several goals or secondary goal | high level of voluntarines | Sample has preexisting health impairments | randomization    | course or training for unemployed or spec. designed alt. treatment |
| Schuring et al. (2009)                       | English | Health only goal                              | low level of voluntariness | No health impairments                     | randomization    | course or training for unemployed or spec. designed alt. treatment |
| Vinokur et al. (1995)                        | English | Health one of several goals or secondary goal | high level of voluntarines | Sample has preexisting health impairments | randomization    | no training/waiting list/booklet                                   |
| Vuori & Silvonen (2005)                      | English | Health one of several goals or secondary goal | high level of voluntarines | Sample has preexisting health impairments | randomization    | no training/waiting list/booklet                                   |

## Coding of type of intervention

|                                        | Intervention<br>includes cognitive<br>Methods | Intervention<br>includes non-<br>cognitive stress<br>management | Intervention<br>includes<br>relaxation<br>techniques | Intervention<br>includes<br>methods to<br>increase social<br>support | Intervention<br>includes teaching<br>of job search<br>methods | Intervention<br>includes direct<br>physical exercise | Intervention includes<br>health counselling |
|----------------------------------------|-----------------------------------------------|-----------------------------------------------------------------|------------------------------------------------------|----------------------------------------------------------------------|---------------------------------------------------------------|------------------------------------------------------|---------------------------------------------|
| Caplan et al. (1989)                   | No                                            | yes                                                             | no                                                   | yes                                                                  | yes                                                           | no                                                   | no                                          |
| Carlier et al. (2017)                  | yes                                           | no                                                              | no                                                   | no                                                                   | yes                                                           | no                                                   | no                                          |
| Creed et al. (1998)                    | no                                            | no                                                              | no                                                   | no                                                                   | yes                                                           | no                                                   | no                                          |
| Creed et al. (1999)                    | yes                                           | yes                                                             | no                                                   | no                                                                   | no                                                            | no                                                   | no                                          |
| Creed et al. (2001)                    | no                                            | no                                                              | no                                                   | no                                                                   | yes                                                           | no                                                   | no                                          |
| Dambrun & Dubuy (2014)                 | no                                            | yes                                                             | no                                                   | no                                                                   | no                                                            | no                                                   | no                                          |
| De Jong et al. (2013)                  | no                                            | no                                                              | yes                                                  | no                                                                   | no                                                            | yes                                                  | no                                          |
| Gabrys et al. (2013)-PAC               | no                                            | no                                                              | no                                                   | no                                                                   | no                                                            | no                                                   | yes                                         |
| Gabrys et al. (2013)-PAC + Exercise    | no                                            | no                                                              | no                                                   | no                                                                   | no                                                            | yes                                                  | yes                                         |
| Hanewinkel et al. (2006)               | no                                            | no                                                              | no                                                   | no                                                                   | no                                                            | no                                                   | yes                                         |
| Harris et al. (2002)                   | yes                                           | no                                                              | yes                                                  | no                                                                   | no                                                            | no                                                   | no                                          |
| Harry & Tiggemann (1992)               | yes                                           | no                                                              | no                                                   | no                                                                   | yes                                                           | no                                                   | no                                          |
| Herbig et al. (2012)                   | no                                            | no                                                              | no                                                   | no                                                                   | no                                                            | yes                                                  | yes                                         |
| Himle et al. (2014)                    | yes                                           | no                                                              | no                                                   | no                                                                   | no                                                            | no                                                   | no                                          |
| Hodzic et al. (2015)                   | no                                            | yes                                                             | no                                                   | no                                                                   | no                                                            | no                                                   | no                                          |
| Hong et al. (2016)                     | no                                            | yes                                                             | yes                                                  | yes                                                                  | yes                                                           | no                                                   | no                                          |
| Hulshof et al. (2020)                  | no                                            | no                                                              | no                                                   | no                                                                   | yes                                                           | no                                                   | no                                          |
| Joseph & Greenberg (2001)              | yes                                           | no                                                              | yes                                                  | no                                                                   | yes                                                           | no                                                   | no                                          |
| Limm et al. (2015)/Horns et al. (2012) | no                                            | no                                                              | no                                                   | no                                                                   | no                                                            | yes                                                  | yes                                         |

|                                              |     |     |     |     |     |     |     |
|----------------------------------------------|-----|-----|-----|-----|-----|-----|-----|
| Machin & Creed (2003)                        | yes | no  | no  | no  | no  | no  | no  |
| Maguire et al. (2014)                        | yes | no  | no  | no  | yes | no  | no  |
| Maysent (1995)                               | yes | yes | yes | no  | no  | no  | no  |
| Merakou et al. (2018)                        | no  | no  | yes | no  | no  | no  | no  |
| Möllmann (2009)/Kellner (2021)               | no  | no  | no  | no  | no  | no  | yes |
| Muller (1992)                                | no  | yes | no  | no  | yes | no  | no  |
| Paver et al. (2020)                          | no  | yes | no  | yes | yes | no  | no  |
| Proudfoot et al. (1997)                      | yes | no  | no  | no  | yes | no  | no  |
| Reynolds et al. (2010)                       | no  | yes | no  | yes | yes | no  | no  |
| Roemer et al. (2017)                         | no  | no  | yes | no  | no  | no  | no  |
| Rothländer et al. (2012) - freely accessible | yes | no  | yes | yes | no  | no  | no  |
| Rothländer et al. (2012) - integrated        | yes | no  | yes | yes | no  | no  | no  |
| Rüsch et al. (2019)                          | yes | no  | yes | yes | no  | no  | no  |
| Saam et al. (1995)                           | yes | yes | no  | no  | no  | no  | no  |
| Schuring et al. (2009)                       | yes | no  | no  | no  | no  | yes | yes |
| Vinokur et al. (1995)                        | no  | yes | no  | yes | yes | no  | no  |
| Vuori & Silvonen (2005)                      | no  | yes | no  | yes | yes | no  | no  |
